# Supplementary material
Source: publisher figshare collection journal article supplement (https://frontiersin.figshare.com/ndownloader/files/29023305)

Supplemental Figure 1. Maps Showing the Locations of Retail Pharmacies and Pharmacy Professionals by Zip Code in Los Angeles County.

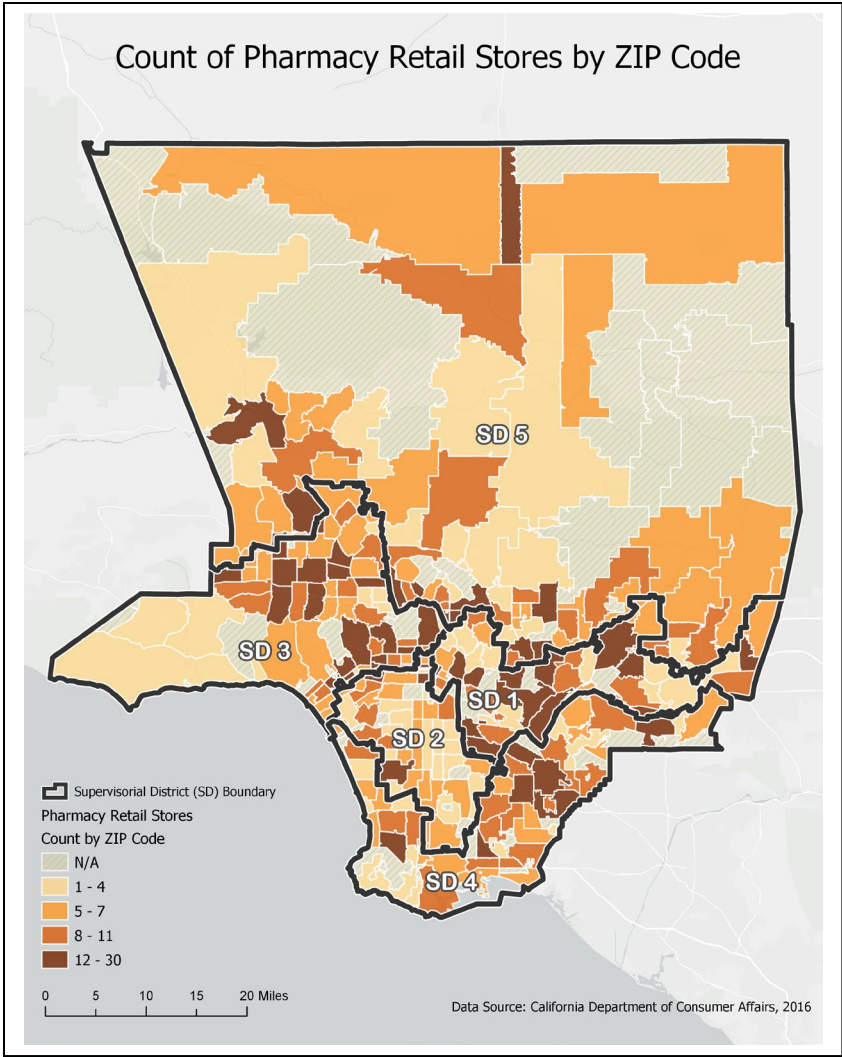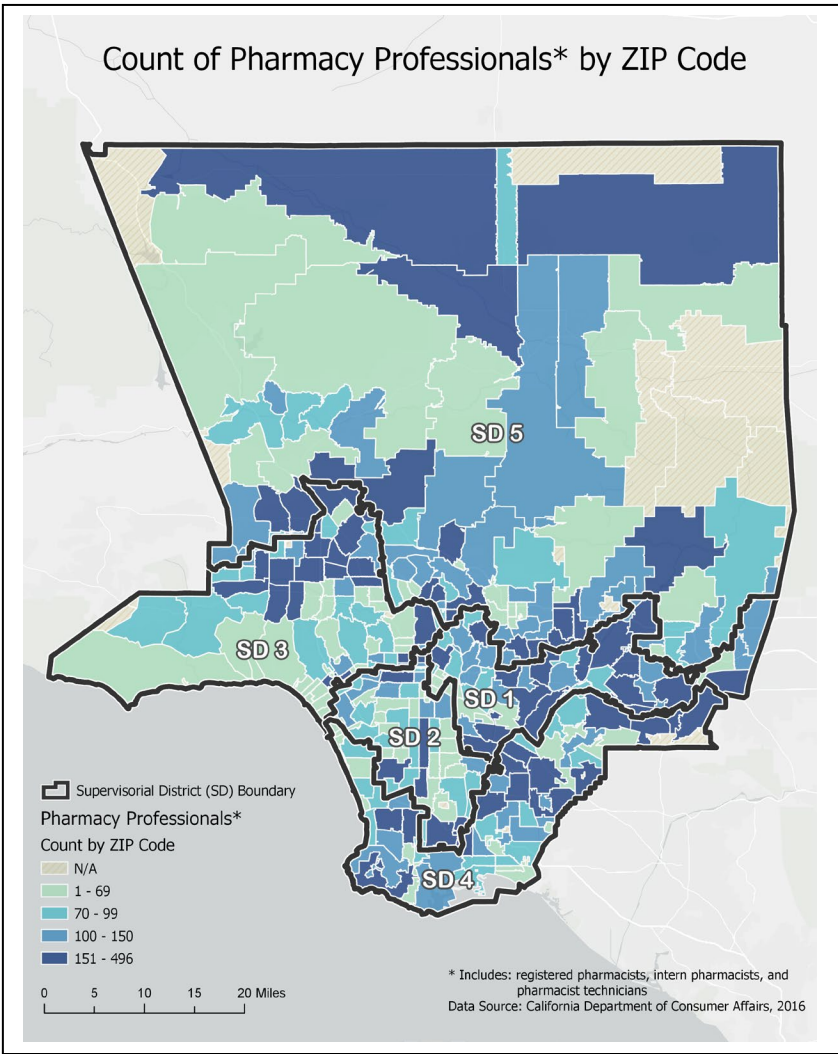

Supplement: Supplementary file [file 29023305]
